# Supplementary material for: Heteronemin, a Spongean Sesterterpene, Induces Cell Apoptosis and Autophagy in Human Renal Carcinoma Cells
Source: Hindawi journal article supplement (doi:10.1155/2015/738241), 2015-01-01
Supplement: f1 [file 738241.f1.pdf]

**Figure S1**

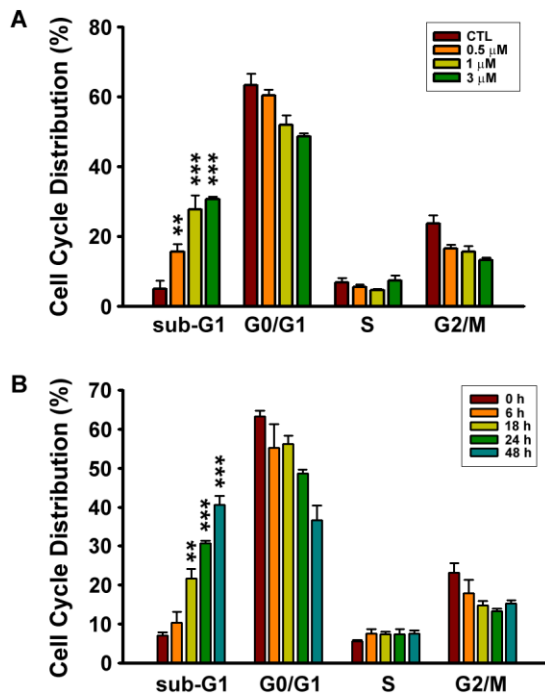

**Fig S1. Effects of heteronemin on cell cycle distribution in A498 cells.** Cells were incubated with vehicle or various concentrations of heteronemin for 24 h or indicated time and detected cell cycle distribution by flow cytometry.

**Figure S2**

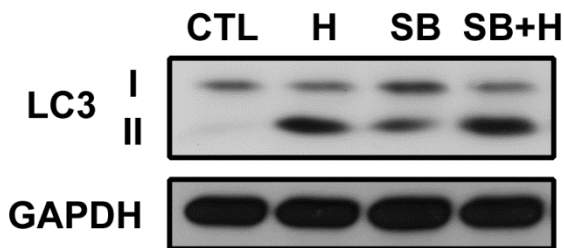

**Fig S2. Effects of SB203580 on heteronemin-induced LC3 conversion in A498 cells.** Cells were incubated with vehicle, heteronemin 3  $\mu$ M, SB203580 25  $\mu$ M and combination of heteronemin and SB203580 for 24 h and detected protein expression by western blotting.
